# Supplementary material for: Metal–organic framework-derived hybrid of Fe3C nanorod-encapsulated, N-doped CNTs on porous carbon sheets for highly efficient oxygen reduction and water oxidation
Source: Royal Society of Chemistry journal article supplement (doi:10.1039/c6cy01031h), 2016-01-01
Supplement: c6cy01031h1.pdf [file c6cy01031h1.pdf]

## Electronic Supplementary Information

# Metal-Organic Framework-Derived Hybrid of Fe<sub>3</sub>C Nanorods-Encapsulated, N-Doped CNT on Porous Carbon Sheet for Highly Efficient Oxygen Reduction and Water Oxidation

Pingping zhao, Xing Hua, Wei Xu, Wei Luo,\* Shengli Chen,\* and Gongzhen Cheng

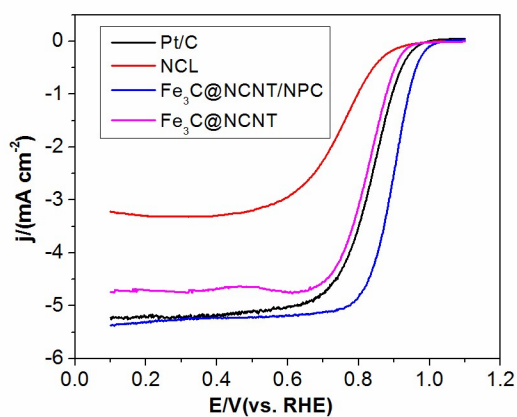

Figure S1. Steady-state polarization curves of ORR obtained with the samples prepared at different temperatures.

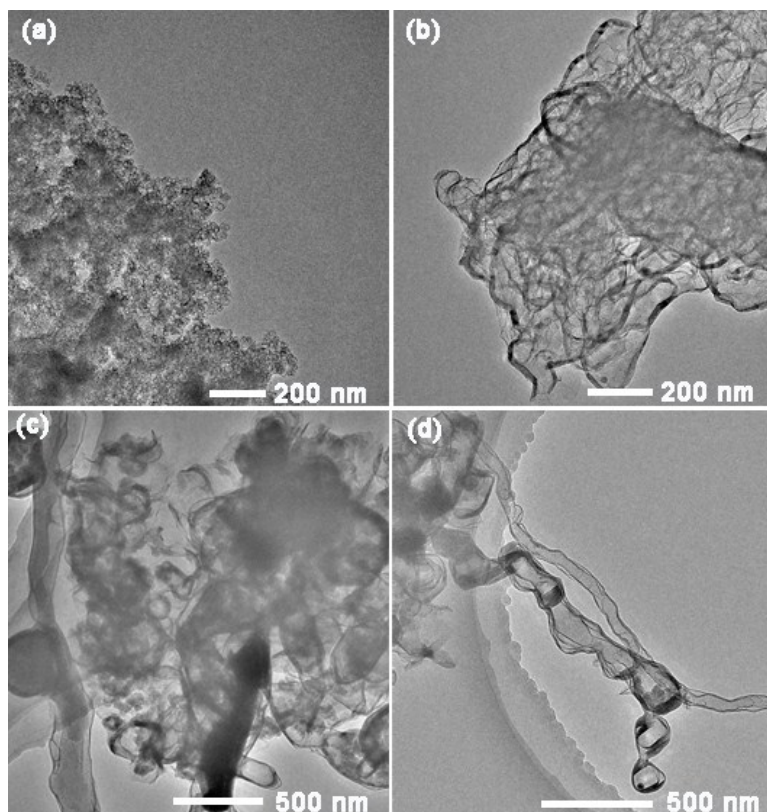

Figure S2. TEM images of the catalysts  $\text{Fe}_3\text{C}@\text{NCNT}/\text{NPC}$  obtained at different reaction stage (a, 0h), (b, 0.5h), (c-d, 1h).

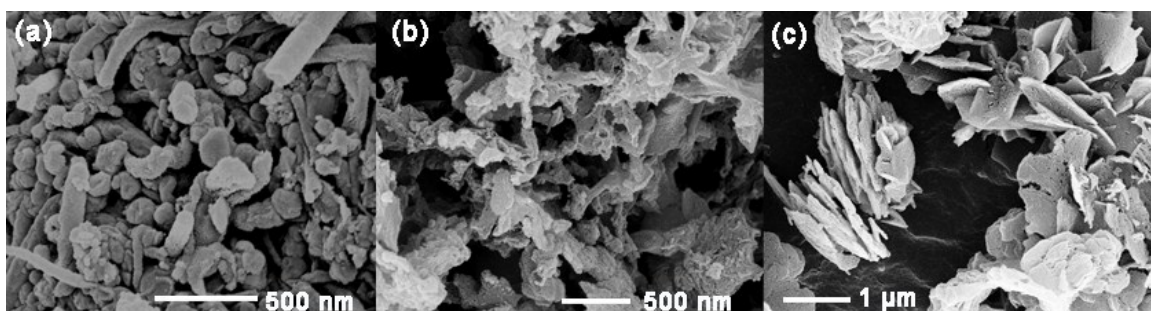

Figure S3. SEM images of the catalysts annealed at 800 °C: (a) with adding 50 wt% melamine; (b) with reducing 50 wt% melamine; (c) pure MOF.

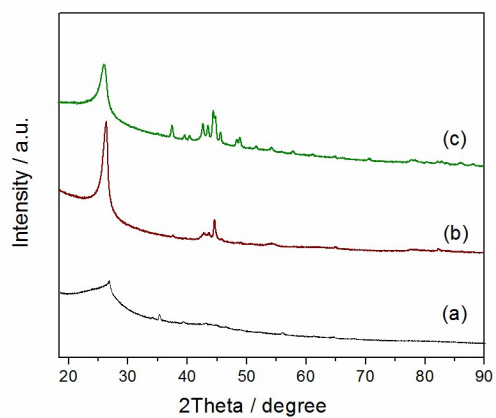

Figure S4. XRD of (a) NCL, (b)  $\text{Fe}_3\text{C@NCNT/NPC}$ , (c)  $\text{Fe}_3\text{C@NCNT}$ .

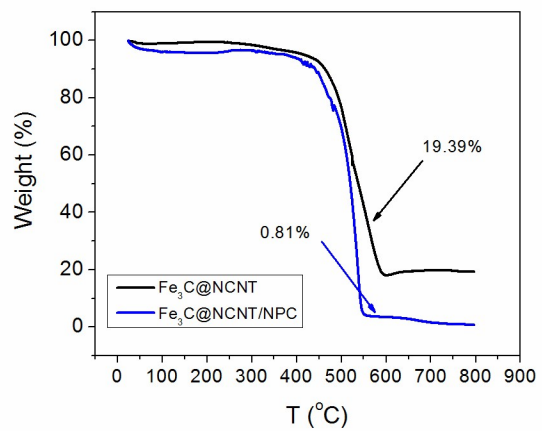

Figure S5. TGA of  $\text{Fe}_3\text{C@NCNT/NPC}$  and  $\text{Fe}_3\text{C@NCNT}$ .

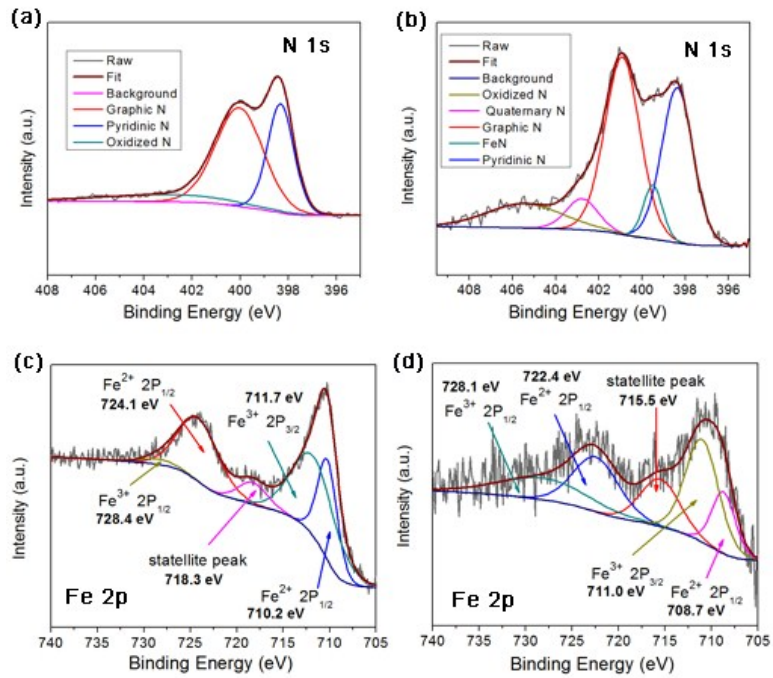

Figure S6. The high-resolution N 1s and Fe 2p spectrum of (a, c) NCL, (b, d) Fe<sub>3</sub>C@NCNT.

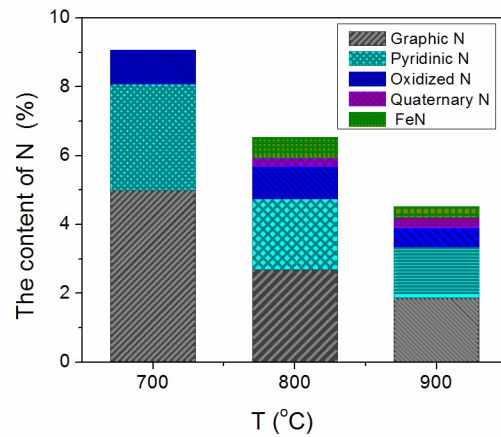

Figure S7. The content of N at different temperatures of 700, 800 and 900 °C for NCL, Fe<sub>3</sub>C@NCNT/NPC and Fe<sub>3</sub>C@NCNT respectively.

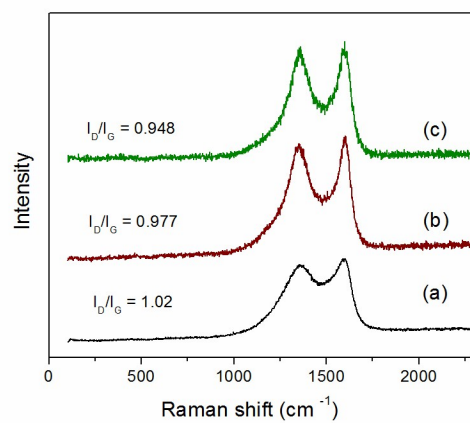

Figure S8. Raman spectrum of (a) NCL, (b) Fe<sub>3</sub>C@NCNT/NPC, (c) Fe<sub>3</sub>C@NCNT.

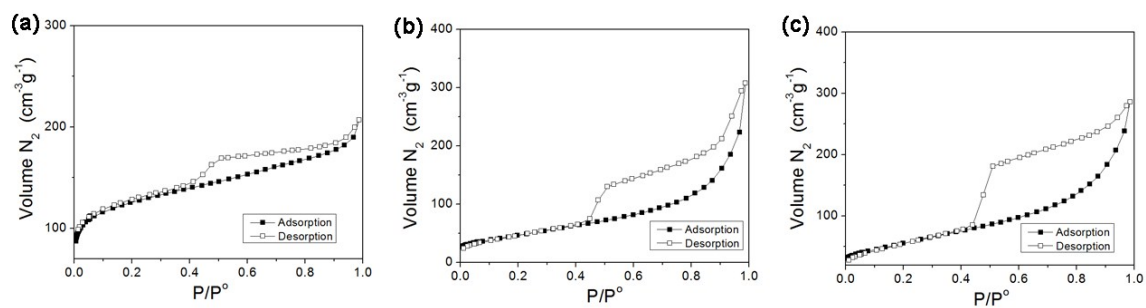

Figure S9. N<sub>2</sub> adsorption-desorption isotherms of (a) NCL, (b) Fe<sub>3</sub>C@NCNT/NPC, (c) Fe<sub>3</sub>C@NCNT.

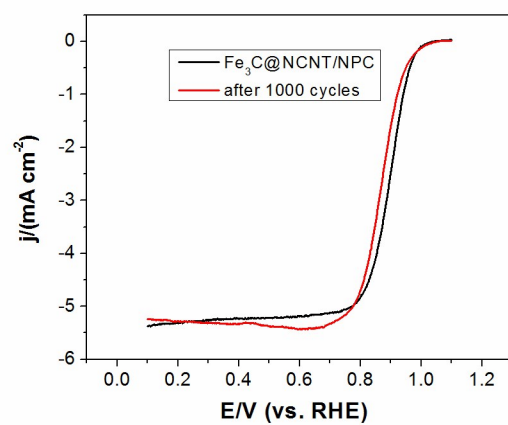

Figure S10. Steady-state polarization curves of ORR obtained with the samples of Fe<sub>3</sub>C@NCNT/NPC after 1000 cycles in 0.1M KOH solution.

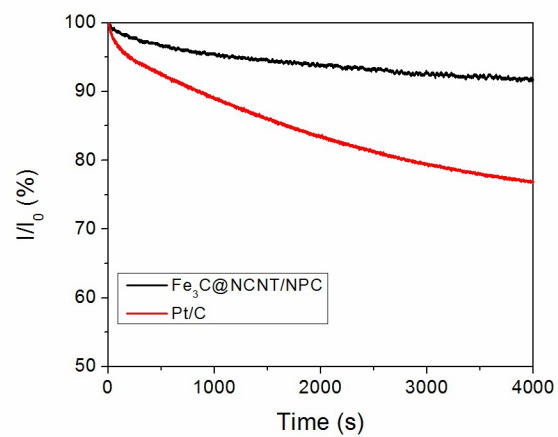

Figure S11. i-t result of Fe<sub>3</sub>C@NCNT/NPC and Pt/C in 0.1 M KOH solution.

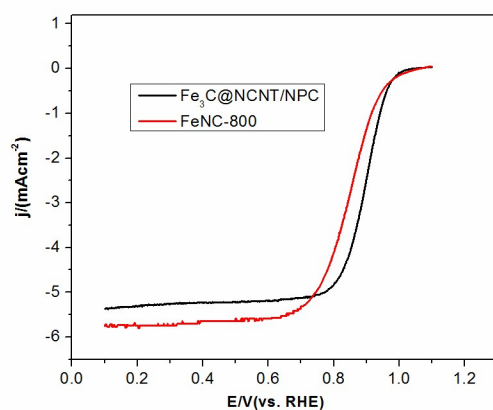

Figure S12. Steady-state polarization curves of ORR obtained with the samples of FeNC-800 and Fe<sub>3</sub>C@NCNT/NPC in 0.1M KOH solution.

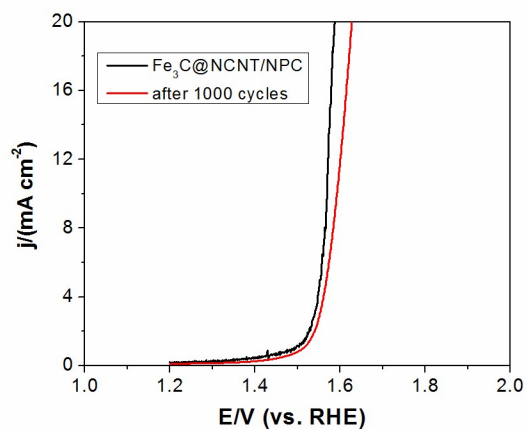

Figure S13. Steady-state polarization curves of ORR obtained with the samples of Fe<sub>3</sub>C@NCNT/NPC after 1000 cycles in 0.1M KOH solution.

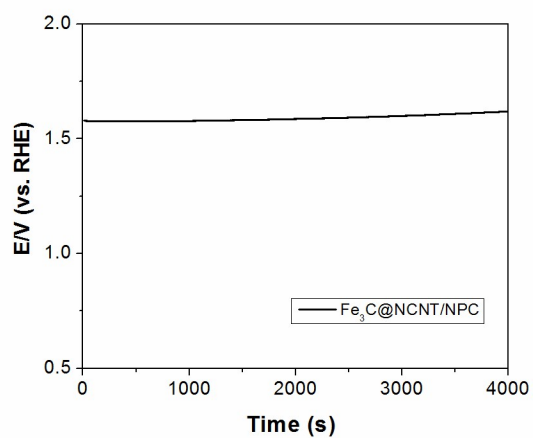

Figure S14. v-t result of  $\text{Fe}_3\text{C@NCNT/NPC}$  toward OER in 0.1 M KOH solution.

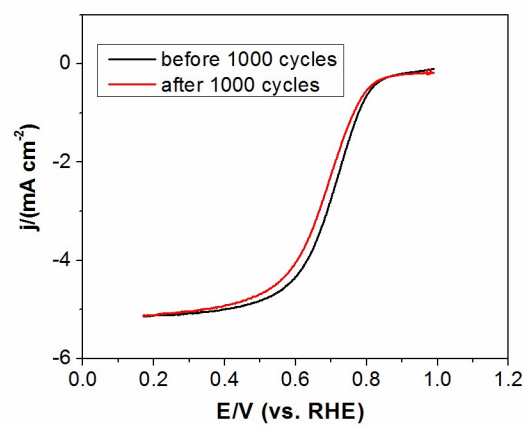

Figure S15. Steady-state polarization curves of ORR obtained with the samples of  $\text{Fe}_3\text{C@NCNT/NPC}$  after 1000 cycles in 0.5 M  $\text{H}_2\text{SO}_4$  solution.



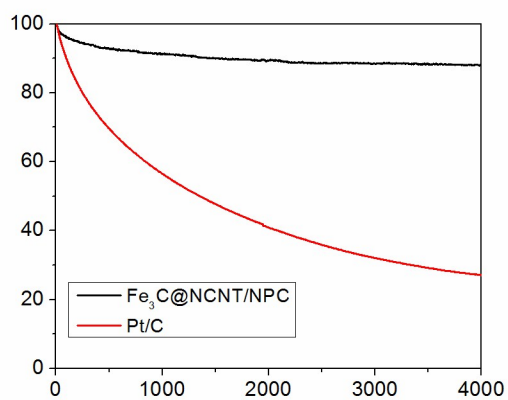

Figure S16. i-t result of Fe<sub>3</sub>C@NCNT/NPC and Pt/C in 0.5 M H<sub>2</sub>SO<sub>4</sub> solution.

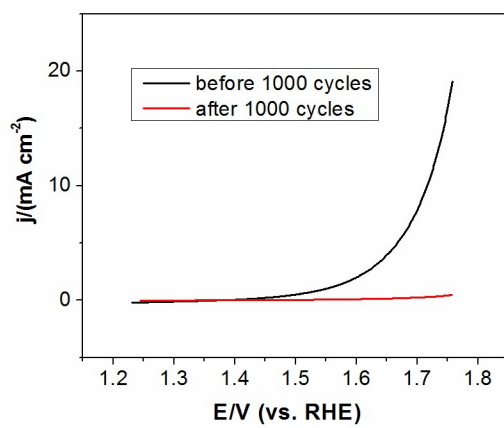

Figure S17. Steady-state polarization curves of OER obtained with the samples of Fe<sub>3</sub>C@NCNT/NPC after 1000 cycles in 0.5 M H<sub>2</sub>SO<sub>4</sub> solution.

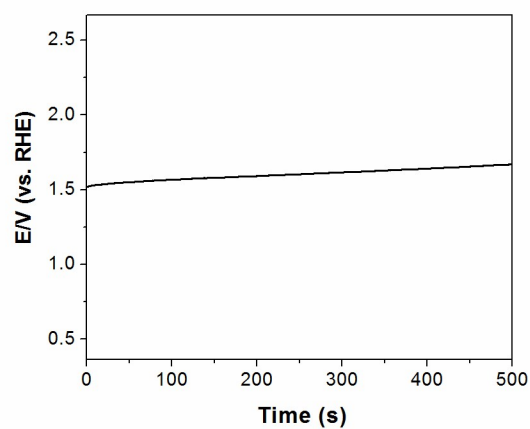

Figure S18. v-t result of Fe<sub>3</sub>C@NCNT/NPC toward OER in 0.5 M H<sub>2</sub>SO<sub>4</sub> solution.

Table S1. N<sub>2</sub> adsorption-desorption characterization of the samples obtained at different temperatures.

| Sample                     | Surface Area<br>(m <sup>2</sup> g <sup>-1</sup> ) | Pore volume<br>(cm <sup>3</sup> g <sup>-1</sup> ) | Pore size<br>(nm) |
|----------------------------|---------------------------------------------------|---------------------------------------------------|-------------------|
| NCL                        | 413.1                                             | 0.279                                             | 1.289             |
| Fe <sub>3</sub> C@NCNT/NPC | 175.1                                             | 0.417                                             | 3.79              |
| Fe <sub>3</sub> C@NCNT     | 211.4                                             | 0.403                                             | 3.969             |

Table S2. Comparison of ORR catalytic performances in alkaline solution between Fe<sub>3</sub>C@NCNT/NPC and other non-precious metal-based catalysts reported previously.

| Catalyst                                    | Onset potential<br>(V vs. RHE) | Half-wave potential<br>(V vs. RHE ) | Ref.      |
|---------------------------------------------|--------------------------------|-------------------------------------|-----------|
| Fe <sub>3</sub> C@NCNT/NPC                  | 1.0                            | 0.90                                | This work |
| P-CNC <sub>Co</sub> -20                     | 0.93                           | 0.85                                | 1         |
| Co@Co <sub>3</sub> O <sub>4</sub> @<br>C-CM | 0.93                           | 0.81                                | 2         |
| NC-900                                      | 0.83                           | 0.68                                | 3         |
| GNPCSS-800                                  | 0.957                          | 0.82                                | 4         |
| CNPs                                        | 1.03                           | 0.85                                | 5         |
| Fe <sub>3</sub> C/C-800                     | 1.05                           | 0.83                                | 6         |
| Fe-N-CNFs                                   | -0.02                          | -0.140                              | 7         |
|                                             | (vs. Ag/AgCl)                  | (vs. Ag/AgCl)                       |           |
| N-graphene/CNT                              | 0.117                          | -                                   | 8         |
| PMF-800                                     | -                              | 0.861                               | 9         |
| FePhen@MOF-ArNH <sub>3</sub>                | 1.03                           | 0.86                                | 10        |
| Fe-N-GC-900                                 | 1.01                           | 0.86                                | 11        |
| Fe-NCB-900                                  | -                              | 0.8                                 | 12        |
| Fe <sub>3</sub> C/NG-800                    | 1.03                           | 0.86                                | 13        |
| NCNT/CoO-NiO-NiCo                           | 1.0                            | 0.83                                | 14        |
| Fe-N/C-800                                  | 0.92                           | 0.81                                | 15        |
| Fe-N <sub>4</sub> /C                        | -                              | 0.87                                | 16        |
| Co <sub>3</sub> O <sub>4</sub> -N-rmGO      | -                              | 0.83                                | 17        |
| N-Fe-CNT/CNP                                | -                              | 0.87                                | 18        |

Table S3. Comparison of OER catalytic performances in alkaline solution between the Fe<sub>3</sub>C@NCNT/NPC and other non-precious metal-based catalysts reported previously.

| Catalyst                                                                  | Overpotential<br>(V) | KOH<br>(M) | Tafel slope<br>(mV dec <sup>-1</sup> ) | Ref.      |
|---------------------------------------------------------------------------|----------------------|------------|----------------------------------------|-----------|
| Fe <sub>3</sub> C@NCNT/NPC                                                | 0.34                 | 1          | 62                                     | This work |
| Fe/C/N                                                                    | 0.36                 | 0.1        | -                                      | 19        |
| Fe@N-C-700                                                                | 0.48                 | 0.1        | -                                      | 20        |
| Co <sub>3</sub> O <sub>4</sub> /rm-GO                                     | 0.31                 | 1          | 67                                     | 17        |
| α-MnO <sub>2</sub> -SF                                                    | 0.49                 | 0.1        | 77.5                                   | 21        |
| Ca <sub>2</sub> Mn <sub>2</sub> O <sub>5</sub> /C                         | 0.47                 | 0.1        | 149                                    | 22        |
| CoO/NG                                                                    | 0.34                 | 1          | 71                                     | 23        |
| Fe-Ni oxides                                                              | 0.38                 | 1          | 51                                     | 24        |
| NiFe-B                                                                    | 0.35                 | 1          | 67                                     | 25        |
| LiNi <sub>1-x</sub> Fe <sub>x</sub> PO <sub>4</sub> @C                    | 0.31                 | 1          | 78                                     | 26        |
| Co(OH) <sub>2</sub>                                                       | 0.35                 | 1          | -                                      | 27        |
| Co <sub>0.5</sub> Fe <sub>0.5</sub> S@N-MC                                | 0.34                 | 1          | 159                                    | 28        |
| Co-P film                                                                 | 0.34                 | 1          | 47                                     | 29        |
| CoCo LDH                                                                  | 0.39                 | 1          | 59                                     | 25        |
| N-CG-Co                                                                   | 0.34                 | 1          | 71                                     | 23        |
| Ni <sub>x</sub> Co <sub>3-x</sub> O <sub>4</sub> nanowire                 | 0.37                 | 1          | 64                                     | 30        |
| ZnCo LDH                                                                  | 0.51                 | 0.1        | 83                                     | 31        |
| graphitic C <sub>3</sub> N <sub>4</sub><br>nanosheets/carbon<br>nanotubes | 0.37                 | 0.1        | 83                                     | 32        |
| P-doped graphitic<br>C <sub>3</sub> N <sub>4</sub>                        | 0.4                  | 0.1        | 62                                     | 33        |

## Reference

- 1 Y. Z. Chen, C. Wang, Z. Y. Wu, Y. Xiong, Q. Xu, S. H. Yu and H. L. Jiang, *Adv. Mater.*, 2015.
- 2 W. Xia, R. Zou, L. An, D. Xia and S. Guo, *Energy Environ. Sci.*, 2015, **8**, 568-576.
- 3 A. Aijaz, N. Fujiwara and Q. Xu, *J. Am. Chem. Soc.*, 2014, **136**, 6790-6793.
- 4 H.-x. Zhong, J. Wang, Y.-w. Zhang, W.-l. Xu, W. Xing, D. Xu, Y.-f. Zhang and X.-b. Zhang, *Angew. Chem. Int. Ed.*, 2014, **53**, 14235-14239.
- 5 S. Zhao, H. Yin, L. Du, L. He, K. Zhao, L. Chang, G. Yin, H. Zhao, S. Liu and Z. Tang, *ACS Nano*, 2014, **8**, 12660-12668.
- 6 Y. Hu, J. O. Jensen, W. Zhang, L. N. Cleemann, W. Xing, N. J. Bjerrum and Q. Li, *Angew. Chem. Int. Ed.*, 2014, **53**, 3675-3679.
- 7 Z. Y. Wu, X. X. Xu, B. C. Hu, H. W. Liang, Y. Lin, L. F. Chen and S. H. Yu, *Angew. Chem. Int. Ed.*, 2015.
- 8 Z. Wen, S. Ci, Y. Hou and J. Chen, *Angew. Chem. Int. Ed.*, 2014, **53**, 6496-6500.
- 9 W. Yang, X. Liu, X. Yue, J. Jia and S. Guo, *J. Am. Chem. Soc.*, 2015, **137**, 1436-1439.
- 10 K. Strickland, E. Miner, Q. Jia, U. Tylus, N. Ramaswamy, W. Liang, M. T. Sougrati, F. Jaouen and S. Mukerjee, *Nat Commun*, 2015, **6**, 7343.
- 11 A. Kong, X. Zhu, Z. Han, Y. Yu, Y. Zhang, B. Dong and Y. Shan, *ACS catal.*, 2014, **4**, 1793-1800.
- 12 A. Serov, K. Artyushkova, E. Niangar, C. Wang, N. Dale, F. Jaouen, M.-T. Sougrati, Q. Jia, S. Mukerjee and P. Atanassov, *Nano Energy*, 2015, **16**, 293-300.
- 13 M. Xiao, J. Zhu, L. Feng, C. Liu and W. Xing, *Adv. Mater.*, 2015, **27**, 2521-2527.
- 14 X. Liu, M. Park, M. G. Kim, S. Gupta, G. Wu and J. Cho, *Angew. Chem. Int. Ed.*, 2015, **54**, 9654-9658.
- 15 L. Lin, Q. Zhu and A. W. Xu, *J. Am. Chem. Soc.*, 2014, **136**, 11027-11033.
- 16 N. Ramaswamy, U. Tylus, Q. Jia and S. Mukerjee, *J. Am. Chem. Soc.*, 2013, **135**, 15443-15449.
- 17 Y. Liang, Y. Li, H. Wang, J. Zhou, J. Wang, T. Regier and H. Dai, *Nat. Mater.*, 2011, **10**, 780-786.
- 18 T. Chung Hoon, H. Won Jong and P. Zelenay, *Nat Commun*, 2013, **4**, 1922.
- 19 Y. Zhao, K. Kamiya, K. Hashimoto and S. Nakanishi, *J. Phys. Chem. C*, 2015, **119**, 2583-2588.
- 20 J. Wang, H. Wu, D. Gao, S. Miao, G. Wang and X. Bao, *Nano Energy*, 2015, **13**, 387-396.
- 21 Y. Meng, W. Song, H. Huang, Z. Ren, S.-Y. Chen and S. L. Suib, *J. Am. Chem. Soc.*, 2014, **136**, 11452-11464.
- 22 J. Kim, X. Yin, K.-C. Tsao, S. Fang and H. Yang, *J. Am. Chem. Soc.*, 2014, **136**, 14646-14649.
- 23 S. Mao, Z. Wen, T. Huang, Y. Hou and J. Chen, *Energy Environ. Sci.*, 2014, **7**, 609-616.
- 24 J. Landon, E. Demeter, N. Inoglu, C. Keturakis, I. E. Wachs, R. Vasic, A. I. Frenkel and J. R. Kitchin, *ACS catal.*, 2012, **2**, 1793-1801.
- 25 F. Song and X. Hu, *Nat. Commun.*, 2014, **5**, 4477.
- 26 S. Ma, Q. Zhu, Z. Zheng, W. Wang and D. Chen, *Chem. Commun.*, 2015, **51**, 15815-15818.
- 27 M. S. Burke, M. G. Kast, L. Trotochaud, A. M. Smith and S. W. Boettcher, *J. Am. Chem. Soc.*, 2015, **137**, 3638-3648.
- 28 M. Shen, C. Ruan, Y. Chen, C. Jiang, K. Ai and L. Lu, *Acs Appl. Mater. Interfaces*, 2015, **7**, 1207-1218.
- 29 N. Jiang, B. You, M. Sheng and Y. Sun, *Angew. Chem. Int. Ed.*, 2015, **54**, 6251-6254.
- 30 Y. Li, P. Hasin and Y. Wu, *Adv. Mater.*, 2010, **22**, 1926-1929.
- 31 Y. Li, L. Zhang, X. Xiang, D. Yan and F. Li, *J. Mater. Chem. A*, 2014, **2**, 13250-13258.
- 32 T. Y. Ma, S. Dai, M. Jaroniec and S. Z. Qiao, *Angew. Chem., Int. Ed.*, 2014, **53**, 7281-7285.
- 33 T. Y. Ma, J. Ran, S. Dai, M. Jaroniec and S. Z. Qiao, *Angew. Chem., Int. Ed.*, 2015, **54**, 4646-4650.
